# Supplementary material
Source: Royal Society of Chemistry journal article supplement (doi:10.1039/d6se00180g)
Supplement: d6se00180g2.pdf [file d6se00180g2.pdf]

Supporting Information

# Real-time Monitoring of Dynamic Changes in Li-Metal Deposition and Dissolution Using a MHz Impedance Sensor

*Keisuke Ishikawa\**, *Shogo Komagata\**, *Hiroki Kondo*, and *Masanori Ishigaki*

Secondary Batteries Research-Domain, Toyota Central R&D Labs., Inc., Nagakute, Aichi  
4801192, Japan

## Proposed sensor

### *Principle of the impedance measurements*

Figure 1a shows a schematic diagram of the sensor circuit, where  $V_b$  denotes the battery voltage and  $L_b$ ,  $R_b$ , and  $C_b$  represent the equivalent passive elements of the battery. The sensor comprises an inductor  $L_r$ , a capacitor  $C_r$ , and a switch  $SW_r$  connected in series with the battery. A resistor  $R_r$  was connected in parallel with the capacitor  $C_r$  to enable its discharge. The resonant current  $I_r$  was converted into a voltage signal  $V_p$  via a transformer composed of the inductor  $L_r$  and a pickup inductor  $L_p$ .  $M$  represents the mutual inductance between  $L_r$  and  $L_p$ , while  $V_{ph}$  is the output of the PH circuit. Battery isolation was achieved through the capacitance at the  $SW_r$  input and the transformer. When  $SW_r$  is closed at  $t = 0$ , the resonant current  $I_r(t)$ , the resonant angular frequency  $\omega_0$ , and the damping factor  $\alpha$  are given by the following expressions:

$$I_r = \frac{V_b}{L_r \omega_0} e^{-\alpha t} \sin \omega_0 t \#(S1)$$

$$\omega_0 = \sqrt{\frac{1}{L_r C_r} - \alpha^2} \#(S2)$$

$$\alpha = \frac{R_b}{2L_r} \#(S3)$$

For Eq. S1 to hold, it is necessary to satisfy  $\omega_0^2 > 0$ . In this context, the LC resonance also incorporates  $C_b$ . Because an LIB forms an electrical double layer and exhibits an extremely large capacitance, the series impedance of  $C_b$  and  $C_r$  can be approximated as  $\frac{C_b C_r}{C_b + C_r} \approx C_r$ . Furthermore, by designing  $L_r$  such that  $L_r \gg L_b$ , the series impedance of  $L_b$  and  $L_r$  can be approximated as

$L_b + L_r \approx L_r$ . Additionally,  $\alpha$  varies according to changes in the battery resistance  $R_b$ . Thus,  $V_p$  is given by:

$$V_p(t) = \frac{MV_b \sqrt{\alpha^2 + \omega_0^2}}{L_r \omega_0} e^{-\alpha t} \sin(\omega_0 t - \beta), \#(S4)$$

$$\beta = \tan^{-1} \left( \frac{\omega_0}{\alpha} \right). \#(S5)$$

$V_p(t)$  reaches its local maximum value when  $\sin(\omega_0 t + \beta) = 1$ . At the local maximum, occurring at

time  $t_N = \frac{(4N-1)\pi + 2\beta}{2\omega_0}$  for  $N = 1, 2, 3, \dots$ , Eq. S4 simplifies to:

$$V_p(t_N) = \frac{MV_b \sqrt{\alpha^2 + \omega_0^2}}{L_r \omega_0} e^{-\alpha t_N} \#(S6)$$

The voltage ratios at arbitrary times  $t_{N_1}$  and  $t_{N_2}$  ( $N_1 < N_2$ ) are expressed as follows:

$$\frac{V_p(t_{N_1})}{V_p(t_{N_2})} = e^{\alpha(t_{N_2} - t_{N_1})}. \#(S7)$$

This equation demonstrates that the error-inducing factors,  $M$  and  $V_b$ , are effectively canceled.

Based on Eqs. S3 and S7,  $R_b$  can be calculated as follows:

$$R_b = \frac{2L_r}{t_{N_2} - t_{N_1}} \ln \frac{|V_p(t_{N_1})|}{|V_p(t_{N_2})|}. \#(S8)$$

In a practical circuit, additional factors such as the discharge resistor  $R_r$  and parasitic resistance  $R_{pr}$  are considered, yielding the following modified expression:

$$R_b = \frac{2L_r}{t_{N_2} - t_{N_1}} \ln \frac{|V_p(t_{N_1})|}{|V_p(t_{N_2})|} - \frac{L_b}{C_r R_r} - R_{pr} \quad \#(S9)$$

It was therefore demonstrated that measurement of the peak values of  $V_p(t_N)$  at any two points allows for the measurement of  $R_b$ .

### *Peak hold circuit*

A switch-type PH circuit was used to acquire the peak voltage of the sensor. The sensitivity of the PH circuit is determined by the time constant formed by  $C_{ch}$  and  $R_{ch}$ . To capture the peak voltage during a single operation, the  $C_{ch}R_{ch}$  time constant must be small. Since optimizing for a high voltage causes an overshoot at low voltage levels, and vice versa, a larger time constant was employed such that the circuit gradually tracked the peak over several cycles.

In the present application, the signal exhibited a damped oscillation, and without intervention, only the largest initial peak was observed. To address this issue, the proposed circuit incorporates a switch ( $SW_r$ ) that selects the desired peak, thereby enabling capture at an arbitrary point. The PH circuit waveforms are shown in Figure S1. The switching timing of  $SW_s$  is given by

$\frac{(4N - 3)\pi + 2\beta}{2\omega_0}$ . When the held voltage  $V_{ph}$  is below  $V_p$ ,  $SW_{ch}$  is activated to charge  $C_{ch}$  until  $V_{ph}$  reaches  $V_p$ ; thereafter,  $C_{ch}$  retains this voltage.

For high-frequency operations, the pulse response of the comparator and the feedback propagation delay of the circuit are critical. Figure S3a shows the minimum pulse width  $t_p$  of the comparator

output and the voltage error  $\Delta V_{pl}$  that may occur when the pulse width is below this threshold. The error for the  $N$ th pulse,  $\Delta V_{pl}(N)$ , is given by:

$$\Delta V_{pl}(N) = \frac{MV_b \sqrt{\alpha^2 + \omega_0^2}}{L_s \omega_0} \left\{ e^{-\alpha t_N} - e^{-\alpha \left( t_N - \frac{t_p}{2} \right)} \cos \frac{\omega_0 t_p}{2} \right\}. \#(S10)$$

Using the voltage ratio between two peaks, the following equation is obtained:

$$\begin{aligned} \frac{V_{ph}(N_1)}{V_{ph}(N_2)} &= \frac{\frac{MV_b \sqrt{\alpha^2 + \omega_0^2}}{L_s \omega_0} e^{-\alpha t_{N_1}} - \Delta V_{pl}(N_1)}{\frac{MV_b \sqrt{\alpha^2 + \omega_0^2}}{L_s \omega_0} e^{-\alpha t_{N_2}} - \Delta V_{pl}(N_2)} \\ &= e^{\alpha(t_{N_2} - t_{N_1})}. \#(S11) \end{aligned}$$

This indicates that  $t_p$  does not affect the impedance calculation. The operational upper frequency limit is therefore determined by the pulse output limit of the comparator,  $\omega_0 < \frac{\pi}{t_p}$ .

Figure S3b illustrates the error  $\Delta V_{dly}$  caused by the feedback delay. The rise and fall signal propagation delays are denoted as  $t_d$ ,  $t_a$  is the start time for charging  $C_{ch}$ ,  $t_w$  is the time elapsed from the start of charging until  $V_{ph} = V_p$ ,  $V_{dd}$  is the supply voltage of  $SW_{ch}$ , and  $V_{ph}$  is the voltage across  $C_{ch}$ . Consequently, the error  $\Delta V_{dly}$  is given by:

$$\begin{aligned} V_{dly} &= V_{ph}(t_a + t_w + t_d) - V_{ph}(t_a + t_w) \\ &= (V_{dd} - V_{ph}(t_a)) \left( e^{-\frac{t_w}{R_{ch} C_{ch}}} - e^{-\frac{t_w + t_d}{R_{ch} C_{ch}}} \right). \#(S12) \end{aligned}$$

This equation indicates that while a larger  $C_{ch} R_{ch}$  time constant reduces the error, it also increases the convergence time, resulting in a trade-off that is similarly observed with higher target voltages.

With this in mind, the first (highest amplitude) peak was selected for measurement. According to Figure 1c, the highest peak voltage occurs at  $t = 0$ ; however, this point is unstable because it depends on factors such as the switching speed of  $SW_r$ . In terms of the absolute value, the most stable and highest peak voltage is obtained when  $\omega_0 t - \beta = \frac{\pi}{2}$ . To obtain this peak, the polarity of the pick-up coil  $L_p$  was inverted, and the voltage was acquired from the inverted damped waveform.

When only the amplitude was considered, the second-highest peak was used. However, if the voltage levels are similar, the resulting ratio may result in a significant error. Optimal selection of the second peak is discussed in the following section.

### *Optimization*

To obtain the most accurate measurement of  $R_b$ , it is crucial to select two optimal peak points from the damped oscillatory waveform. Initially, the extent to which the peak voltage  $V_p(t)$  responds to changes in  $R_b$  was examined. By setting the mutual inductance  $M$  equal to  $L_r$  and differentiating

Eq. S6,  $\frac{\partial V_p(t)}{\partial R_b}$  can be determined as follows:

$$\frac{\partial V_p(t)}{\partial R_b} = \frac{V_b \sqrt{\alpha^2 + \omega_0^2}}{2L_r} \left( \frac{\alpha}{\omega_0^3} - \frac{t}{\omega_0} \right) e^{-\alpha t} \quad \#(S13)$$

In this calculation, it was assumed that  $L_r = 1 \mu\text{H}$ ,  $C_r = 25 \text{ nF}$ , and  $V_b = 3.3 \text{ V}$ .  $R_b$  was varied from 0.2 to 1  $\Omega$ . When  $R_b$  was small, the time at which the maximum sensitivity was observed increased.

The sensitivity was maximized when  $\frac{\partial V_p(t)}{\partial R_b}$  reached an extreme value, i.e., when its time derivative

of  $\frac{\partial V_p(t)}{\partial R_b}$  became zero. Solving this condition leads to the optimal time  $t_{opt}$ , which is given by:

$$t_{opt} = \frac{2L_r}{R_b} + \frac{R_b}{2L_r\omega_0^2} \#(S14)$$

Equation S14 shows that  $t_{opt}$  can be obtained based on  $L_r$ ,  $R_b$ , and  $\omega_0$ . Thus, after  $\omega_0$  has been determined according to the frequency characteristics of the battery, and upon setting the value of  $L_r$ , the optimal peak positions can be derived from  $R_b$ . Consequently, the two optimal PH positions are defined as follows:  $t_{N1}$  is selected as the peak with the largest amplitude and the highest signal-to-noise ratio according to Eq. S12, while  $t_{N2}$  is selected as the peak at which the sensitivity to resistance changes is maximized, as indicated by Eq. S14.

Subsequently, design of  $L_r$  was considered. Since,  $t_{opt}$  must correspond to the second or later peak

voltage, the relationship  $t_{opt} > \frac{2\pi}{\omega_0}$  must be met. By substituting this condition into Eq. S14, the lower bound of  $L_r$  can be obtained, as follows:

$$L_r > \frac{R_b}{2\omega_0}(\pi + \sqrt{\pi^2 - 1}) \#(S15)$$

Under these conditions, the choice of  $L_r$  involves a tradeoff. Specifically, a larger  $L_r$  reduces the current amplitude, as shown in Eq. S1, and allows for a smaller  $C_r$ , which reduces the power consumption. However, a larger inductance increases the parasitic resistance, leading to a greater measurement error. Conversely, if  $L_r$  is too small, the battery inductance  $L_b$  causes fluctuations in

the resonant frequency, compromising the accuracy of the battery state assessment. Therefore, it is necessary to design  $L_r$  by carefully considering these tradeoffs.

**Table S1. Sensor parameters**

| Symbol                           | Description          |
|----------------------------------|----------------------|
| $L_r$                            | 1.1445 $\mu\text{H}$ |
| $C_r$                            | 30 nF                |
| $R_r$                            | 1 k $\Omega$         |
| $N_{L_r}:N_{L_p}$                | 4:2                  |
| $C_{ch}$                         | 100 nF               |
| $R_{ch}$                         | 10 k $\Omega$        |
| $\frac{L_b}{C_r R_r}$            | 38.16 m $\Omega$     |
| $R_{pr}$                         | 66.74 m $\Omega$     |
| $\Delta t (= t_{N_2} - t_{N_1})$ | 2.32 $\mu\text{s}$   |
| SW <sub>r</sub>                  | CSD16340Q3           |
| SW <sub>s</sub>                  | SN74AHCT1G126        |
| SW <sub>ch</sub>                 | SN74LVC1G126         |
| SW <sub>dch</sub>                | BSS816NW             |
| Op-amp1                          | AD8038               |
| Op-amp2                          | AD8066               |

|            |        |
|------------|--------|
| Comparator | LT1719 |
|------------|--------|

**Table S2. Specifications of the tested commercial batteries**

|                         |                                                               |
|-------------------------|---------------------------------------------------------------|
| Model name              | INR18650 M26                                                  |
| Sample name             | NCM                                                           |
| Battery type            | 18650                                                         |
| Anode material          | Graphite                                                      |
| Cathode material        | $\text{LiNi}_{0.49}\text{Co}_{0.2}\text{Mn}_{0.31}\text{O}_2$ |
| Nominal voltage         | 3.65 V                                                        |
| Cutoff voltage          | 2.75–4.2 V                                                    |
| Nominal capacity        | 2600 mAh                                                      |
| Weight                  | 44.0 g                                                        |
| Standard charge current | 1250 mA at 25 °C                                              |
| Max charge current      | 2500 mA                                                       |

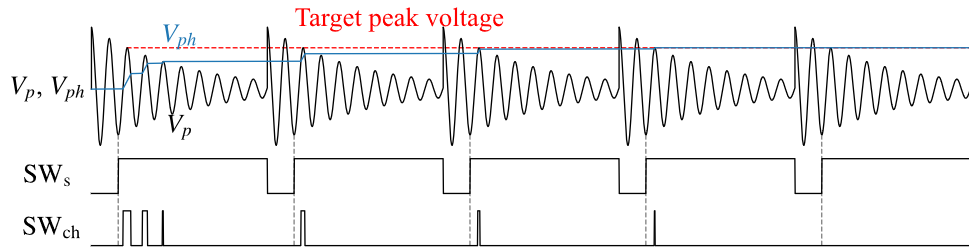

**Figure S1. Operating waveforms and switch timing of the proposed PH circuit.**

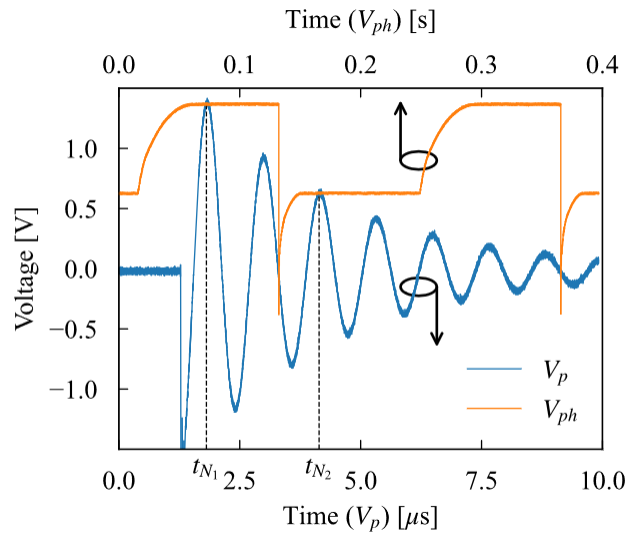

**Figure S2. Experimental waveforms of the proposed PH circuit.**

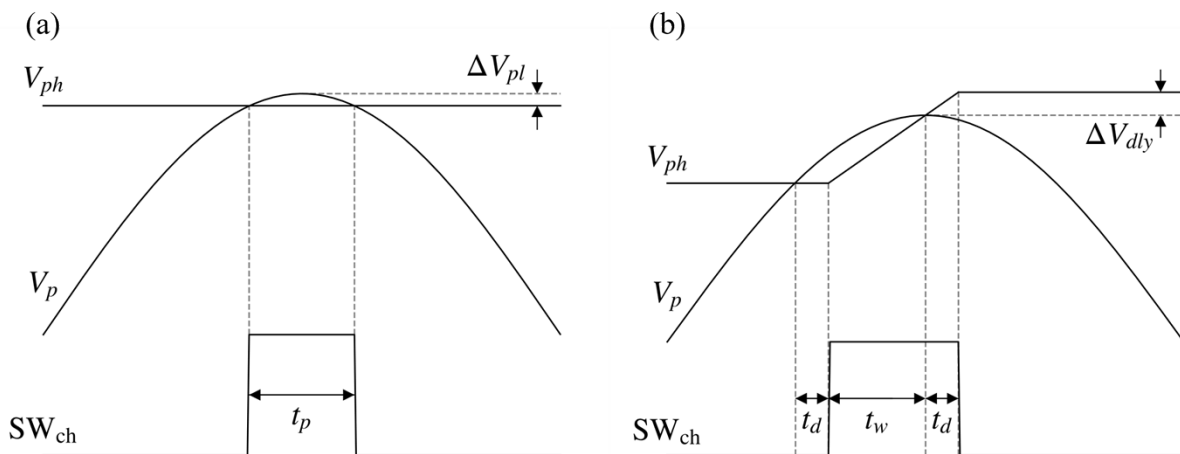

**Figure S3. PH output voltage error waveforms: (a) based on the minimum pulse width and (b) based on the feedback delay.**

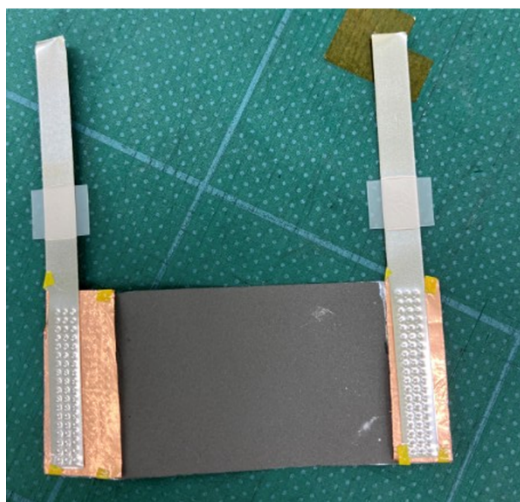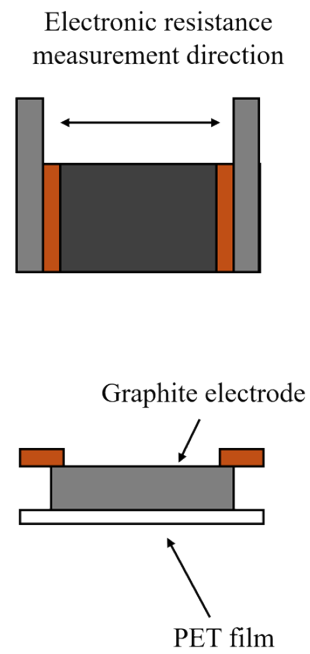

**Figure S4. Photographic image and cross-sectional schematic representation of the graphite electrode used for the MHz-range  $\text{Re}(Z)$  measurements.**

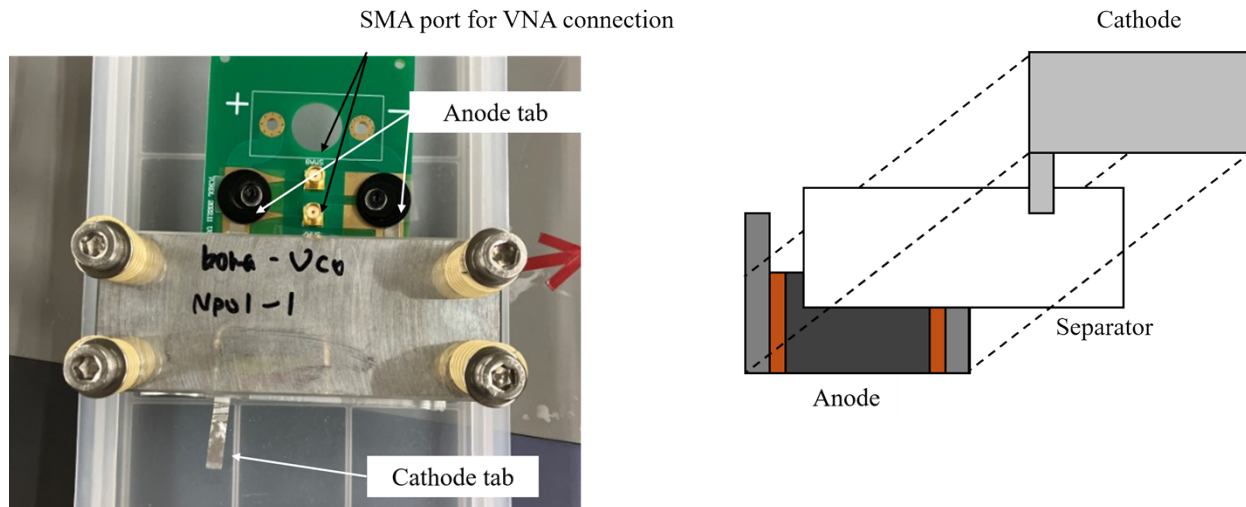

**Figure S5. Cell setup used to perform the MHz-range  $\text{Re}(Z)$  measurements for the graphite electrode.**

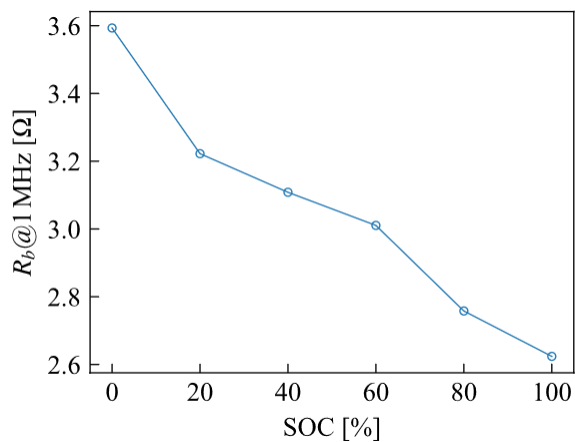

**Figure S6. SOC dependence of the in-plane  $R_b$  at 1 MHz for the graphite electrode.**

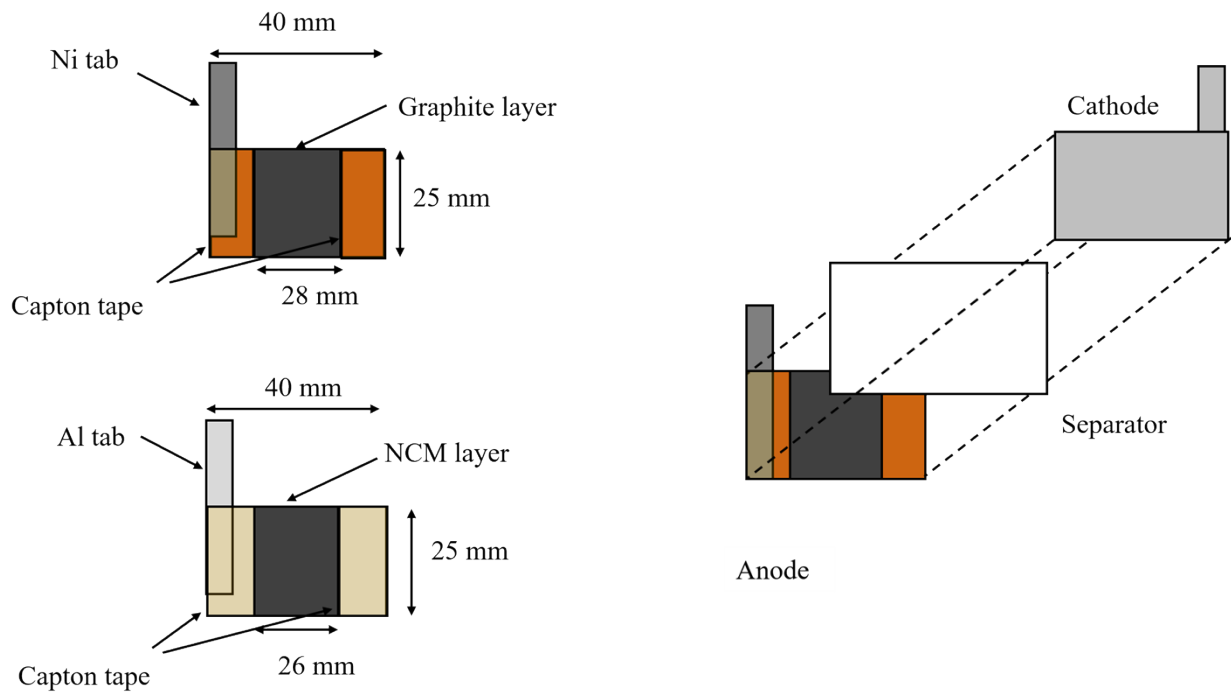

**Figure S7. Schematic representation of the cross-sectional observation cell.**

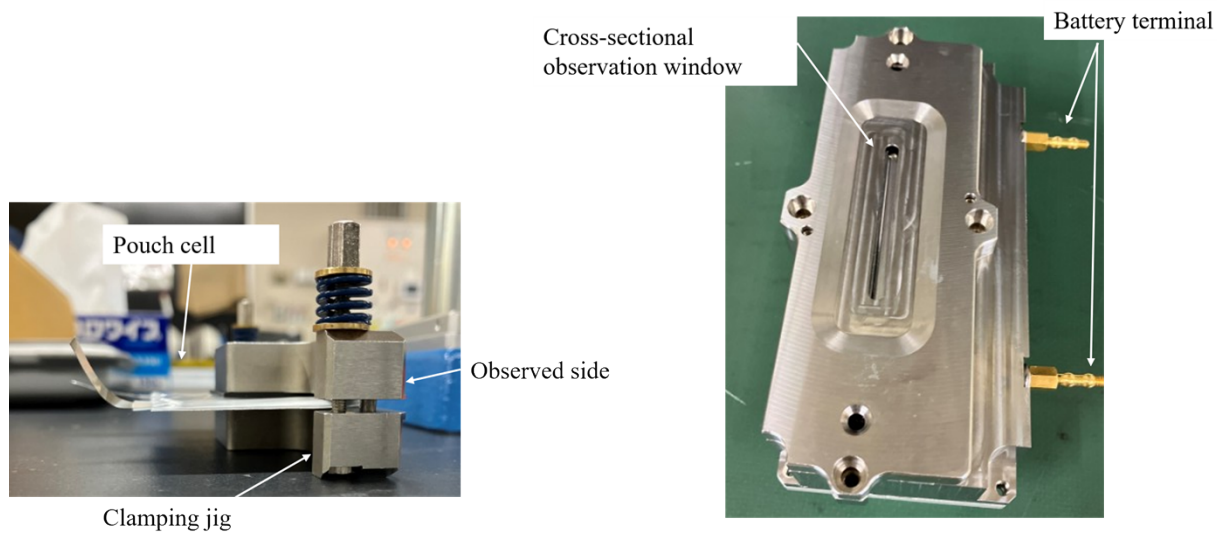

**Figure S8. Photographic images of the mechanically constrained cross-sectional observation cell equipped with a viewing window.**

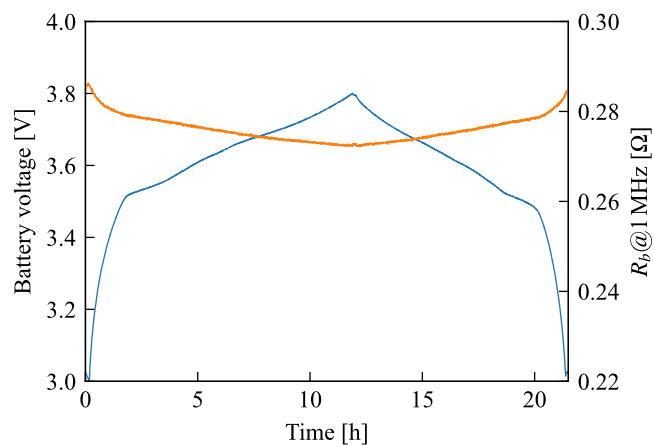

**Figure S9. Battery voltage and sensor output,  $R_b$ , recorded during an charge and discharge without Li-metal deposition.**

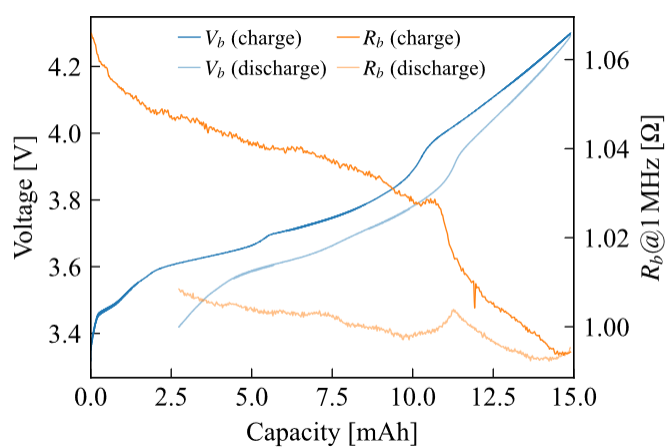

**Figure S10. Plots of the battery voltage and sensor output  $R_b$  versus the delivered charge in the cross-sectional observation cell.**

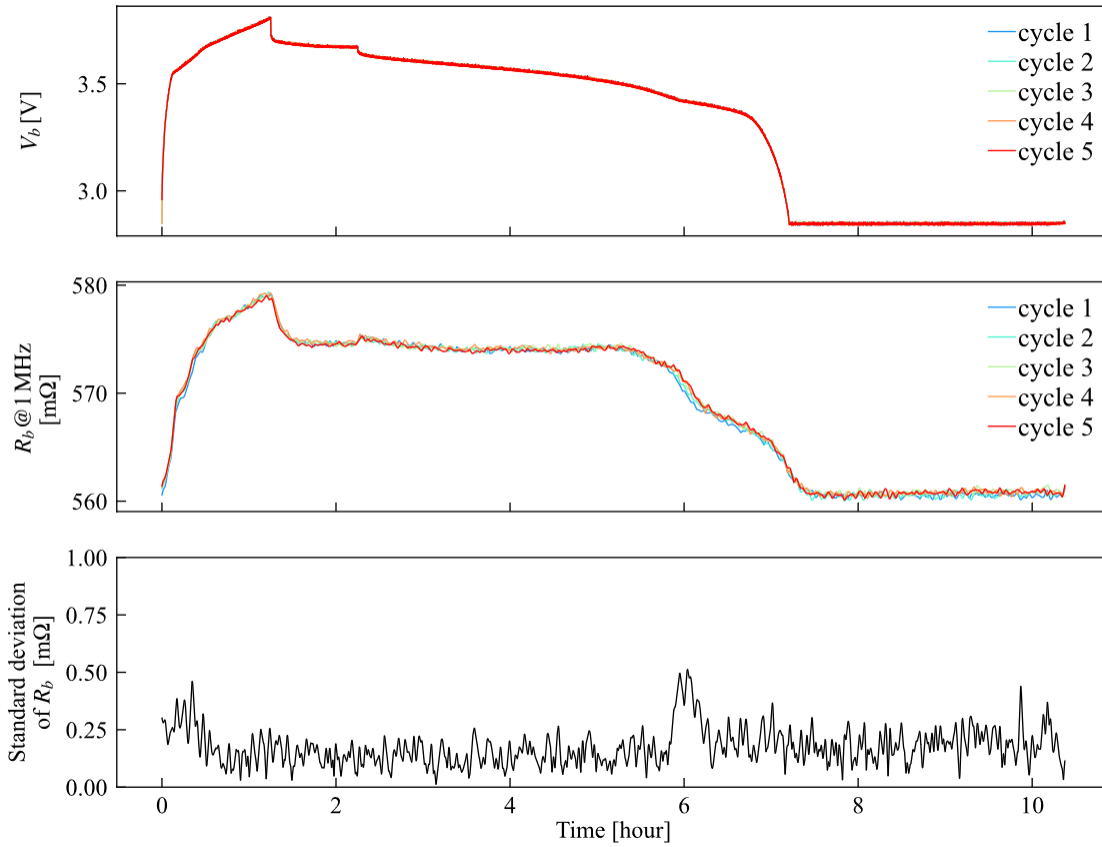

**Figure S11.**  
**Measurement reproducibility and standard deviation**

**tion of the sensor during 0.4C charge and 0.1C discharge cycles.**

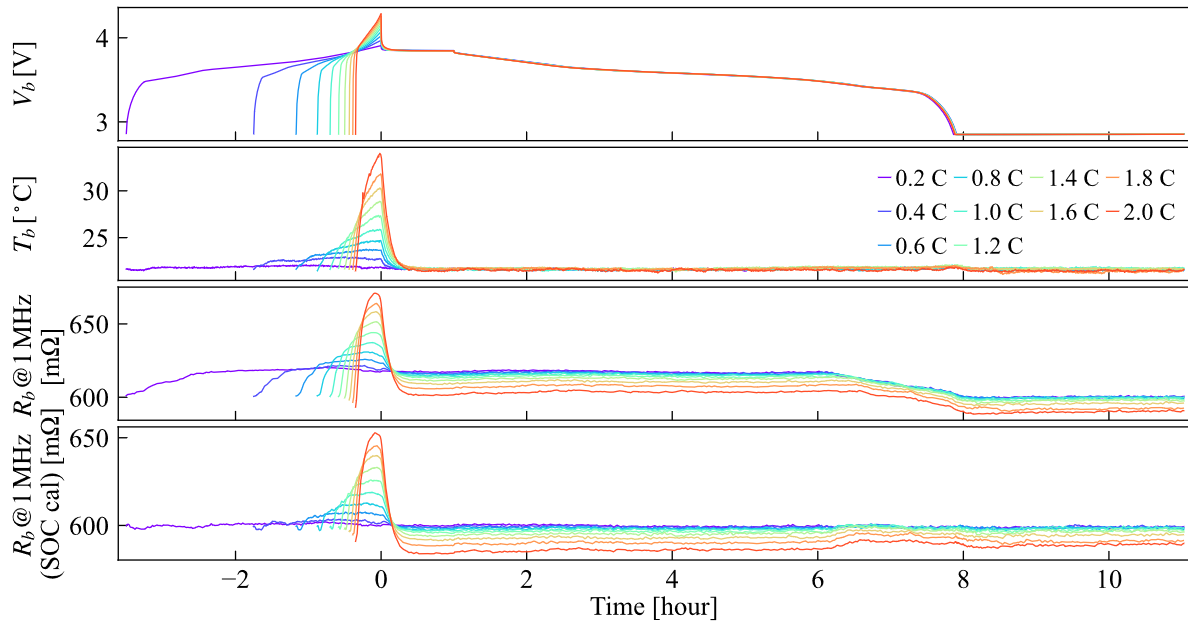

**Figure S12. Stepwise C-rate test in which the charge rate was raised by 0.2 C each cycle, with each cycle being charged from 0 to 70% SOC.**
